# Supplementary material
Source: Research Square preprint supplement (doi:10.21203/rs.3.rs-8903177/v1)
Supplement: Supplementary file 1 [file 7ff21e7fbc487501feadf472.docx]

**Appendix 1.**

The timeline and key priorities for establishing China's New Generation Artificial Intelligence Innovation and Development Pilot Zones.

| Serial Number | Pilot Zones Name | Establishment Time | Key Priorities for the Development |
| --- | --- | --- | --- |
| 1 | Beijing's New Generation Artificial Intelligence Innovation and Development Pilot Zone | February 20, 2019 | Establish open artificial intelligence platforms and application scenarios to drive the R&D and deployment of general-purpose AI technologies. |
| 2 | Shanghai New Generation Artificial Intelligence Innovation and Development Pilot Zone | May 22, 2019 | Deepen the integration of AI with economic and social development to enhance innovation capabilities in AI science and technology. |
| 3 | Tianjin New Generation Artificial Intelligence Innovation and Development Pilot Zone | October 17, 2019 | Coordinate the development of AI across China's eastern, central, western, and northeastern regions, fostering AI as a key driver of regional growth. |
| 4 | Shenzhen New Generation Artificial Intelligence Innovation and Development Pilot Zone | October 17, 2019 | Leverage advantages in R&D and talent to build an internationally competitive AI innovation hub, while strengthening institutional and mechanism innovations. |
| 5 | Hangzhou New Generation Artificial Intelligence Innovation and Development Pilot Zone | October 17, 2019 | Develop a leading AI industrial cluster to support and guide Hangzhou in further expanding its digital economy and achieving high-quality development. |
| 6 | Hefei New Generation Artificial Intelligence Innovation and Development Pilot Zone | October 17, 2019 | Capitalizing on the concentration of research institutions and expert teams in fields such as robotics, cultivate a cohort of leading enterprises as well as technology-based small and medium-sized enterprises. |
| 7 | Deqing New Generation Artificial Intelligence Innovation and Development Pilot Zone | November 2, 2019 | Explore new models through which AI can lead the high-quality development of the county-level economy and underpin the Rural Revitalization Strategy. |
| 8 | Chongqing New Generation Artificial Intelligence Innovation and Development Pilot Zone | January 23, 2020 | Scale up industries such as AI hardware and robotics, and fully leverage AI's role in transforming and upgrading traditional industrial bases. |
| 9 | Chengdu New Generation Artificial Intelligence Innovation and Development Pilot Zone | January 23, 2020 | Strengthen AI applications in scenarios like inclusive finance and smart healthcare. Foster new business forms and models driven by cross-sector integration, thereby promoting the development of an open industrial system. |
| 10 | Xi'an New Generation Artificial Intelligence Innovation and Development Pilot Zone | January 23, 2020 | Develop a suite of effective industry-specific solutions in advanced manufacturing, commercial logistics, and related fields, creating a new engine for innovation-driven development. |
| 11 | Jinan New Generation Artificial Intelligence Innovation and Development Pilot Zone | January 23, 2020 | Promote innovative AI applications in key scenarios such as manufacturing, agriculture, and transportation to facilitate the intelligent transformation and upgrading of traditional industries. |
| 12 | Guangzhou New Generation Artificial Intelligence Innovation and Development Pilot Zone | September 3, 2020 | Focus on fields such as healthcare and high-end manufacturing to enhance technology integration and converged applications, thereby boosting the level of industrial intelligence and international competitiveness. |
| 13 | Wuhan New Generation Artificial Intelligence Innovation and Development Pilot Zone | September 3, 2020 | Establish benchmark innovative applications in domains including intelligent connected vehicles, smart manufacturing, intelligent digital design and construction, and smart healthcare. |
| 14 | Suzhou New Generation Artificial Intelligence Innovation and Development Pilot Zone | March 24, 2021 | Capitalize on manufacturing strengths by focusing on priority areas such as industrial robotics and equipment manufacturing. Strengthen the R&D and application of technologies like machine learning and intelligent computing to foster a deep integration of AI with manufacturing. |
| 15 | Changsha New Generation Artificial Intelligence Innovation and Development Pilot Zone | March 24, 2021 | Leverage AI-related academic and educational resources, focusing on key areas such as intelligent equipment and smart factories to cultivate intelligent industrial clusters. |
| 16 | Zhengzhou New Generation Artificial Intelligence Innovation and Development Pilot Zone | November 13, 2021 | Conduct technology integration and innovative applications in fields such as intelligent logistics, smart manufacturing, and precision agriculture, fostering industrial clusters for smart sensors, intelligent connected vehicles, and related sectors. |
| 17 | Shenyang New Generation Artificial Intelligence Innovation and Development Pilot Zone | November 13, 2021 | Focus on key domains including intelligent robotics and smart manufacturing, strengthening technology integration and converged applications to elevate the level of manufacturing intelligence. |
| 18 | Harbin New Generation Artificial Intelligence Innovation and Development Pilot Zone | November 13, 2021 | Enhance unique industrial applications in Harbin, establishing benchmark innovative applications in areas such as smart agriculture and intelligent manufacturing, as well as in cold-region scenarios. |
